1  
2 **Subset selection of markers for genome-enabled prediction of genetic values**  
3 **using radial basis function neural networks**  
4

5 **Genome-enabled prediction of genetic values using radial basis function**  
6 **neural networks**  
7

8 Isabela de Castro Sant' Anna<sup>1</sup>, Gabi Nunes Silva<sup>2</sup>, Moysés Nascimento<sup>1</sup>, Cosme Damião Cruz<sup>3</sup>

9 <sup>1</sup> Department of Statistics, Federal University of Viçosa, Viçosa, Minas Gerais, Brazil

10 <sup>2</sup> Department of Statistics, Federal University of Rondônia, Ji-Paraná, Rondônia, Brazil

11 <sup>3</sup> Department of General Biology, Federal University of Viçosa, Viçosa, Minas Gerais, Brazil

12 \*Corresponding author

13 E-mail: [isabelacsantanna@gmail.com](mailto:isabelacsantanna@gmail.com)  
14

15 **Abstract**

16 This paper aimed to evaluate the efficiency of subset selection of markers for genome-enabled  
17 prediction of genetic values using radial basis function neural networks (RBFNN). For this  
18 purpose, an F1 population from hybridization of divergent parents with 500 individuals  
19 genotyped with 1,000 SNP-type markers was simulated. Phenotypic traits were determined by  
20 adopting three different gene action models – additive, additive-dominant, and epistatic ,  
21 complying with two dominance situations: partial and complete with quantitative traits  
22 admitting heritability ( $h^2$ ) equal to 30 and 60%, each one controlled by 50 loci, considering two  
23 alleles per locus, totaling 12 different scenarios. To evaluate the predictive ability of RR\_BLUP  
24 and the neural networks, a cross-validation procedure with five replicates were trained using  
25 80% of the individuals of the population. Two methods were used: dimensionality reduction  
26 and stepwise regression. The square of the correlation between the predicted genomic estimated

27 breeding value (GEBV) and the phenotype value was used to measure predictive reliability. For  
28  $h^2 = 0.3$  in the additive scenario, the  $R^2$  values were 59% for neural network (RBFNN) and 57%  
29 for RR-BLUP, and in the epistatic scenario,  $R^2$  values were 50% and 41%, respectively.  
30 Additionally, when analyzing the mean-squared error root, the difference in performance  
31 between the techniques is even greater. For the additive scenario, the estimates were 91 for RR-  
32 BLUP and 5 for neural networks and, in the most critical scenario, they were 427 for RR-BLUP  
33 and 20 for neural network. The results showed that the use of neural networks and variable  
34 selection techniques allows capturing epistasis interactions, leading to an improvement in the  
35 accuracy of prediction of the genetic value and, mainly, to a large reduction of the mean square  
36 error, which indicates greater genomic value.

37 **Keywords:** simulation; genomics; linkage disequilibrium; breeding.

38

## 39 **Introduction**

40

41 One of the major challenges of genetic breeding today is understanding the genetic  
42 variation of quantitative traits, QTL (Quantitative trait loci), which are conditioned by a large  
43 number of genes with small effects [1] whose interaction often results in non-linearity in  
44 relations between phenotypes and genotypes [2,3].

45 With the advent of Genomic Selection (GS) [4], it became possible to estimate the  
46 genomic value of individuals (GEBV) without the need of phenotyping, which led to an  
47 increase in genetics gain by reducing time and money. Therefore, for many traits of agronomic  
48 importance, genetic values are determined by multiple genes of small effects and their  
49 phenotypic expression is strongly affected by genetic interaction between their additive,  
50 dominant and epistatic effects. However, most applications of GS include only the additive  
51 portion of the genetic value, so a more realistic representation of the genetic architecture of

52 quantitative traits should include dominance and epistatic interactions, since these effects are  
53 crucial factors to increase the accuracy of prediction [5].

54 The inclusion of these interactions is computationally challenging and leads to the  
55 superparametrization of the models that are already in high dimensionality because of the large  
56 number of markers in the genome and the smallest number of individuals [2]. Besides that,  
57 before fitting the model it is necessary to define the model effects to be estimated. In this  
58 context, Artificial Neural Networks (ANNs) have a great potential because they can capture  
59 non-linear relationships between markers from the data themselves (without a previous model  
60 definition), which most of the models commonly used in the GS cannot do [2,6,7].

61 Radial Basis Function Neural Networks (RBFNN) are a particular class of Neural  
62 Networks (NN) that have properties that make it attractive to GS applications. According to  
63 Gianola et al. [8], RBFNNs have the ability to learn from the data used in their training, have  
64 universal approximation properties [9], give a unique solution and are faster than standard  
65 ANNs [10].

66 However, the inclusion of all markers in the prediction RBFNN model increases the  
67 chances of a high correlation between the markers [11]. The number of markers represents a  
68 huge challenge that leads to less precision and a great computational demand for NN training.  
69 This happens because NNs use good part of their resources to represent irrelevant portions of  
70 the search space and compromising the learning process because there are thousands of markers  
71 available in the genome [12]. Thus, a more realistic model should include only SNPs related to  
72 the traits of interest [6].

73 For this reason, a subset of SNPs can be used for training, since, by reducing the search  
74 space, RBFNNs improve the learning process and increase the predictive power of the model,  
75 as realized by [2]. These authors used two types of RBFNN models: one considering a common  
76 weight parameter for each SNP, and the other in which each SNP has specific parameters of

77 importance. However, due to the importance of NNs for the improvement of prediction of  
78 quantitative traits, there is still a need to test different dimensionality reduction methods and  
79 prediction models for polygenic traits.

80 In view of the above, this paper aimed to evaluate the efficiency of genome-enabled  
81 prediction by radial basis function neural networks (RBFNN) in the prediction of genetic values  
82 by considering a subset of markers in simulated data set with different gene actions (as  
83 dominance and epistasis) and degrees of heritability. The results were compared with those  
84 obtained by one of the standard GS model: RR-BLUP.

85

## 86 **Material and methods**

### 87 **Origin of populations**

88 In order to assess the reliability of GS predictions, data were simulated by considering  
89 a diploid species with  $2n = 2x = 20$  chromosomes as the reference, and the total length of the  
90 genome was stipulated in 1.000 cM. Genomes were generated with a saturation level of 101  
91 molecular markers spaced by 1cM per linkage group, totaling 1010 markers. Divergent parental  
92 line genomes were simulated, as well as genomes from the base population ( $F_1$ ). Since the base  
93 population was derived from two contrasting homozygous parents, the effective size of the base  
94 population is the size of  $F_1$  itself.

### 95 **Simulation of quantitative traits**

96 Quantitative traits were simulated in three scenarios by considering three degrees of  
97 dominance ( $d/a = 0, 0.5$  and  $1$ ) and two broad sense heritability ( $h^2 = 0.30$  and  $0.60$ ), considering

98 two gene actions: additive and epistatic, thus totaling six scenarios. Each trait was controlled  
99 by 50 randomly chosen loci, with 2 alleles per locus.

100 The phenotypic values of the  $i^{\text{th}}$  individuals were obtained according to the additive  
101 model as follows:

$$102 \quad Y_i = \mu + \sum_{j=1}^{50} p_j \alpha_j + E_i \quad (1)$$

103 where  $\alpha_j$  is the effect of the favorable allele in locus  $j$ , considered equal to 1, 0 or -1 for  
104 the genotypic classes AA, Aa and aa, respectively, and  $p_j$  is the contribution of locus  $j$  to the  
105 manifestation of the trait under consideration. In this study, the contribution of each locus was  
106 established as being equivalent to the probability of the set generated by the binomial  
107 distribution  $X \sim b(a+b)^s$ , where  $a=b=0.5$  and  $s = (50)$ . The value of  $d_i$  was defined according to  
108 the average degree of dominance expressed in each trait.  $E_i$  is the environmental effect,  
109 generated according to a normal distribution with means equal to zero and variance given by  
110 the equation bellow:

$$111 \quad \sigma_e^2 = \frac{\sigma_g^2(1-h^2)}{h^2} \quad (2)$$

112

113 where  $\sigma_e^2$  is the variance given by the environmental values,  $\sigma_g^2$  is the variance of the genetic  
114 values, and  $h^2$  is the heritability defined for the trait. The genetic variance is defined from the  
115 information of the genetic control and the importance of each locus in the polygenic model.

116 For the epistatic model, the phenotypic values of the  $i^{\text{th}}$  individuals were obtained  
117 according to the following equation:

$$118 \quad Y_i = \mu + \sum_{j=1}^{50} p_j \alpha_j + \sum_{j=1}^{49} p_j \alpha_j \alpha_{j+1} + E_i \quad (3)$$

119 In the above equation, the first summation of the expression refers to the contribution  
120 of the individual locus through its additive and dominant effects and the second summation  
121 represents the multiplicative effects corresponding to the epistatic interactions between pairs of

122 loci  $\alpha_j$  is the multiplicative effect of the favorable allele in locus  $j$ , and  $j+1$  and  $p_j$  is the  
123 contribution of locus  $j$  to the manifestation of the trait under consideration.

124 **Table 1.** Scenarios composed by combination of traits, action genic model.  
125 heritability and dominance degree.

| Traits          | Heritability (%) | Model             | dominance |
|-----------------|------------------|-------------------|-----------|
| V1-D0H30_Ad     | 30               | additive          | 0         |
| V2-D0.5H30_Ado  | 30               | additive-dominant | 0.5       |
| V3-D1H30_Ado    | 30               | additive-dominant | 1         |
| V4 - D0H30Ep    | 30               | epistatic         | 0         |
| V5 - D0.5H30Ad  | 30               | epistatic         | 0.5       |
| V6 - D1H30Ep    | 30               | epistatic         | 1         |
| V7 - D0H60Ad    | 60               | additive          | 0         |
| V8 - D0.5H60Ado | 60               | additive-dominant | 0.5       |
| V9 - D10H30Ado  | 60               | additive-dominant | 1         |
| V10 - D0H60Ad   | 60               | epistatic         | 0         |
| V11 - D1H60Ado  | 60               | epistatic         | 0.5       |
| V12 - D1H60Ep   | 60               | epistatic         | 1         |

126

127

128

## 129 RR-BLUP

130 The RR-BLUP model was used to obtain the genomic estimated breeding values  
131 (GEBV) [4]:

$$132 \quad y = Xb + Za + e, \quad (4)$$

133 where  $y$  is the vector of phenotypic observations,  $b$  is the vector of fixed effects,  $a$  is the vector  
134 of random marker effects, and  $e$  refers to the vector of random errors,  $N(0, \sigma_e^2)$ ;  $X$  and  $Z$  are  
135 matrices of incidence for  $a$  and  $b$ . The effects of the individuals (GEBVs) were estimated by  
136 the equation below:

$$137 \quad GEBVs = \hat{y}_i = \sum_j^n Z_{ij} \hat{\alpha}_j, \quad (5)$$

138 where  $n$  is the number of markers arranged in the genome,  $Z_{ij}$  is the line of the matrix of  
139 incidence that allocates the genotype of the  $j^{\text{th}}$  marker for each individual ( $i$ ), 1, 0, -1 for  
140 genotypes  $A_1A_1$ ,  $A_1A_2$ ,  $A_2A_2$ , respectively, for biallelic and codominant markers, and  $\hat{\alpha}_j$  is the  
141 effect of the  $j^{\text{th}}$  marker estimated by RR-BLUP. In this model, the incidence matrix associated  
142 with the effects of dominance was not included. However, it should be remembered that the  
143 population has probably allele frequency being  $p$  different from  $q$  and therefore the additive  
144 effects estimated through matrix  $Z$  capture dominance effects.

## 145 **Radial Basis Function Neural Network (RBFNN)**

146 A RBFNN is an artificial neural network that uses radial basis functions as activation  
147 functions. The RBFNN in the present study is a three layered feed-forward neural network,  
148 where the first layer is linear and only distributes the input signal, while the next layer is  
149 nonlinear and uses Gaussian functions (Fig 1).

150

151 **Fig. 1 Structure of a radial basis function neural network (RBFNN).** In the hidden layer,  
152 each input vector ( $x_{i1}, \dots, x_{ip}$ ) is summarized by the Euclidean distance between the input  
153 vectors  $x_i$  and the centers  $c_m$  ( $m = 1, \dots, M$ ) neurons, i.e.,  $h_m \|x_i - c_m\|$ , where  $h_m$  is a  
154 bandwidth parameter. Then distances are transformed by the Gaussian kernel  $\exp(-(h_m \|x_i -$   
155  $c_m\|)^2)$  for obtaining the response,  $y_i = \mathbf{w}0 + \sum_{m=1}^M + \mathbf{w}mzmi + \varepsilon_i$  (extracted from  
156 Gonzalez-Camacho et al., 2012).

157 The training of RBFNN optimization includes: the weights between the hidden layer  
158 and the output layer, the activation function, the center of activation functions, the distribution  
159 of center of activation functions, and the number of hidden neurons [13]. During the training  
160 process, only the weights between the hidden layer and the output layer are modified. The  
161 vector of weights  $\omega = \{w_1, \dots, w_s\}$  of the linear output layer is obtained using the ordinary  
162 least-squares fit that minimizes the mean squared differences between  $y_i$  (from RBFNN) and

163 the observed  $y_i$  observed in the training set, provided that the Gaussian RBFs for centers  $c_k$   
164 and  $h_k$  of the hidden layer are defined.

165 The radial basis function selected is usually a Gaussian kernel selected using K-means  
166 clustering algorithm. The centers are selected using the orthogonalization least-squares  
167 learning algorithm, as described by [14] and implemented in [15]. The centers are added  
168 iteratively such that each new selected center is orthogonal to the others. The selected centers  
169 maximize the decrease in the mean squared error of the RBFNN, and the algorithm stops  
170 when the number of centers (neurons) added to the RBFNN attains a desired precision (goal  
171 error) or when the number of centers is equal to the number of input vectors, that is, when  
172  $S=n$ .

173 To select the best RBFNN, a grid for training the net was generated, containing  
174 different spread values and different precision values (goal error). The spread value ranging  
175 from 5 to 100 and an initial value of 0.01 for the goal error was considered. The spread  
176 parameter allows adjusting the form of the Gaussian RBFNN such that it is sufficiently large  
177 to respond to overlapping regions of the input space but not so big that it could induce the  
178 Gaussian RBFNN to have a similar response [16].

## 179 **SNP subset selection**

180 To determine the number of markers, stepwise regression was used in the scenario with epistatic  
181 effects, dominance and low heritability. In this procedure, the maximum number of markers  
182 was determined in conjunction with measures representative of the data as the mean square  
183 error root of the model (MSER), determination coefficient ( $R^2$ ) obtained by inclusion of the  
184 selected markers, and the condition number (CN) of the correlation matrix. As for the first two  
185 criteria, the MSER chosen was the one that presented the lowest possible value tied to the best  
186 possible values for  $R^2$  (the higher the better). The third criterion was used to avoid



187 multicollinearity problems. The condition number of the correlation matrix between the  
188 explanatory variables verifies the degree of multicollinearity in the correlation matrix  $X'X$   
189 [17]. When the CN resulting from this division was lower than or equal to 100, it was  
190 considered that there was weak multicollinearity between the explanatory variables; for  $100 <$   
191  $CN < 1000$  moderate to severe multicollinearity, and for  $CN \geq 1000$  severe multicollinearity was  
192 considered. So, based on a graphical analysis, the number was determined by the graphical  
193 point with the best  $R^2$ , the lowest REQM when  $100 < CN$ .

$$194 \quad NC = \frac{\lambda_n}{\lambda_1} \quad (6)$$

195 where  $\lambda_n$  is the eigenvalue of largest absolute value and  $\lambda_1$  of the smallest.

## 196 **Computational applications for data analysis**

197 The models were compared using the reliability ( $R^2$ ) defined as the squared correlation  
198 between the predicted GEBVs of the individuals with no phenotypic traits and the root mean  
199 squared error (RMSE) using predicted and realized values. A five-fold cross-validation scheme  
200 was used to determine the reliability of genomic prediction of a selected subset of SNPs in the  
201 population. The individuals (500) were randomly split into five equal-size groups and each  
202 group with about 100 individuals (20% of the population) was in turn assigned with phenotypic  
203 values and used as the validation set. The reliability of genomic prediction was calculated as  
204 the squared correlation between the predicted GEBVs of the individuals with no phenotypic  
205 traits. The reliability reported in the study was the average of the reliability of genomic  
206 prediction from 5-fold groups. For comparison purposes, the reliability of genomic prediction  
207 from all the SNPs (1000) was also calculated, in addition to 100 SNPs selected to be even.. The  
208 simulations were implemented with software GENES [18] and the statistical analyses were  
209 performed with software R, with the RR-BLUP package [19].

210

## 211 Results

212 Dimensionality reduction was performed using a graphical procedure that considers the of the  
213 model, the determination coefficient ( $R^2$ ) obtained by including the selected markers and the condition  
214 number (CN) of the correlation matrix. The number of markers was determined by the graphical point  
215 which presented the larger ( $R^2$  and the lowest MSER when  $100 < CN$  (Fig 2). After defining the optimal  
216 number of markers, stepwise regression was used to select, among all markers, those used in the  
217 fit.

218  
219

220 **Figure 2:** A graphical representation of the values of determination coefficient ( $R^2$ ) in black,  
221 Mean squared error root (MSER) in red and the condition number(CN) in blue obtained by  
222 the stepwise regression method by including 1 to 400 molecular markers (from the total of  
223 1000) in the stepwise regression model.  
224

225 Twelve different scenarios considering different levels of heritability, dominance and  
226 epistatic effects were evaluated (Table 2 and 3). Five cross-validation folds were used to access  
227 the reliability ( $R^2$ ) of fit models (RBFNN and RR-BLUP), considering or not dimensionality  
228 reduction.

229 Overall, dimensionality reduction improved the reliability values for all scenarios,  
230 specifically, with  $h^2=30$  the reliability value from 0.03 to 0.59 using RBFNN and from 0.10 to  
231 0.57 with RR-BLUP in the scenario with additive effects. In the additive dominant scenario,  
232 the reliability values changed from 0.12 to 0.59 using RBFNN and from 0.12 to 0.58 with RR-  
233 BLUP, and in the epistasis scenarios the reliability values changed from 0.07 to 0.50 using  
234 RBFNN and from 0.06 to 0.47 with RR-BLUP (Table 2).

235 In the scenarios with  $h^2= 60$ , the reliability value improved from 0.38 to 0.79 using  
236 RBFNN and from 0.36 to 0.79 with RR-BLUP in the scenario with additive effects. In the  
237 scenario with additive dominance, the values changed from 0.34 to 0.79 using RBFNN and  
238 from 0.30 to 0.73 with RR-BLUP, and in the epistatic scenarios the average of reliability values  
239 changed from 0.10 to 0.60 using RBFNN and from 0.08 to 0.58 with RR-BLUP (Table 2).



241 **Table 2.** Reliability values of selection obtained from RBFNN (Radial Basic Neural  
 242 Network) and RR-BLUP through all markers (1000) or selected markers (100) by Stepwise  
 243 Regression(SWR) in a set of validation data involving cross-validation procedures.

| Reliability Values          |             |             |             |             |
|-----------------------------|-------------|-------------|-------------|-------------|
| Scenarios                   | 1000 RBFNN  | 1000 RRBLUP | 100 RBFNN   | 100 RR-BLUP |
| V <sub>1</sub> -D0H30_Ad    | 0.11 ± 0.12 | 0.10 ± 0.02 | 0.59 ± 0.02 | 0.57 ± 0.03 |
| V <sub>2</sub> -D0.5H30_Ado | 0.12 ± 0.06 | 0.12 ± 0.07 | 0.59 ± 0.03 | 0.58 ± 0.05 |
| V <sub>3</sub> -D1H30_Ado   | 0.02 ± 0.01 | 0.01 ± 0.01 | 0.56 ± 0.07 | 0.54 ± 0.06 |
| V <sub>4</sub> -D0H30_Ep    | 0.03 ± 0.00 | 0.01 ± 0.01 | 0.45 ± 0.05 | 0.42 ± 0.05 |
| V <sub>5</sub> -D0.5H30_Ep  | 0.05 ± 0.02 | 0.02 ± 0.02 | 0.56 ± 0.05 | 0.54 ± 0.06 |
| V <sub>6</sub> -D1H30_Ep    | 0.07 ± 0.05 | 0.06 ± 0.05 | 0.50 ± 0.05 | 0.47 ± 0.04 |
| V <sub>7</sub> -D0H60_Ad    | 0.38 ± 0.08 | 0.36 ± 0.07 | 0.79 ± 0.03 | 0.79 ± 0.03 |
| V <sub>8</sub> -D0.5H60_Ado | 0.34 ± 0.07 | 0.30 ± 0.07 | 0.74 ± 0.03 | 0.73 ± 0.03 |
| V <sub>9</sub> -D1H60_Ado   | 0.18 ± 0.04 | 0.19 ± 0.05 | 0.64 ± 0.02 | 0.64 ± 0.01 |
| V <sub>10</sub> -D0H60Ep    | 0.06 ± 0.03 | 0.03 ± 0.05 | 0.58 ± 0.05 | 0.79 ± 0.05 |
| V <sub>11</sub> -D0.5H60_Ep | 0.10 ± 0.02 | 0.08 ± 0.07 | 0.62 ± 0.04 | 0.59 ± 0.09 |
| V <sub>12</sub> -D1H60_Ep   | 0.13 ± 0.03 | 0.13 ± 0.07 | 0.58 ± 0.08 | 0.58 ± 0.09 |

244  
 245 Table 3 shows the range of values for the accuracy of prediction (MSER = mean squared  
 246 err root). For all scenarios with and without dimensionality reduction, RBFNN outperformed  
 247 RRBLUP. Besides that, dimensionality reduction also improved the accuracy of RBFNN and  
 248 RRBLUP. The MSER value ranged from 3.5 to 23.8 for RBFNN and from 71.4 to 575.4 for  
 249 RR-BLUP. Specifically, with  $h^2=30$  the MSER value ranged from 5.9 to 4.9 using RBFNN and  
 250 from 33.7 to 23.4 with RR-BLUP in the scenario with additive effects. In the additive-  
 251 dominance scenario, the average of MSER values changed from 11.5 to 9.3 using RBFNN and  
 252 from 47.1 to 29.4 with RR-BLUP, and in the epistasis scenarios the average of MSER values  
 253 changed from 19.73 to 13.76 using RBFNN and from 380.7 to 2773.9 with RR-BLUP .

254 In the scenarios with  $h^2=60$ , the MSER value improved from 4.5 to 3.4 using RBFNN  
 255 and from 85.8 to 71.4 with RR-BLUP in the scenario with additive effects. In the scenario with  
 256 additive dominance, the average of values changed from 5.0 to 4.0 using RBFNN and from  
 257 23.76 to 88.43 with RR-BLUP and in the epistasis scenarios the average of reliability values  
 258 changed from 15.9 to 13.2 using RBFNN and from 257.9.0 to 358.3 with RR-BLUP.

259

260 **Table 3.** Mean squared error root obtained from RBFNN and RR-BLUP through all markers  
 261 (1000) or selected markers (100) by Stepwise Regression(SR)in a set of validation data  
 262 involving cross-validation procedures.  
 263

| MSER –mean squared error root |            |              |            |              |
|-------------------------------|------------|--------------|------------|--------------|
| Scenarios                     | 1000 RBF   | 1000 RR-BLUP | 100 RBF    | 100-RRBLUP   |
| V <sub>1</sub> -D0H30_Ad      | 5.9 ± 0.1  | 33.7 ± 2     | 4.9 ± 0.1  | 23.4 ± 0.0   |
| V <sub>2</sub> -D0.5H30_Ado   | 6.2 ± 0.1  | 36.0 ± 1.3   | 5.1 ± 0.1  | 24.9 ± 3.7   |
| V <sub>3</sub> -D1H30_Ado     | 16.8 ± 1.2 | 58.2 ± 5.7   | 13.5 ± 0.1 | 34.9 ± 17.7  |
| V <sub>4</sub> -D0H30_Ep      | 16.9 ± 1.2 | 267.9 ± 10.5 | 14.2 ± 0.1 | 205.9 ± 48.1 |
| V <sub>5</sub> -D0.5H30_Ep    | 18.5 ± 0.6 | 338.1 ± 17.7 | 15.5 ± 0.3 | 232.1 ± 18.9 |
| V <sub>6</sub> -D1H30_Ep      | 23.8 ± 1.7 | 534.6 ± 24   | 20.8 ± 0.3 | 395.9 ± 40.6 |
| V <sub>7</sub> -D0H60_Ad      | 4.5 ± 0.1  | 20.7 ± 1     | 3.4 ± 0.4  | 11.99 ± 0.9  |
| V <sub>8</sub> -D0.5H60_Ado   | 4.7 ± 0.2  | 22.4 ± 2     | 3.7 ± 0.1  | 107.4 ± 1.1  |
| V <sub>9</sub> -D1H60_Ado     | 5.4 ± 0.2  | 28.23 ± 2    | 4.3 ± 0.1  | 145.9 ± 5.2  |
| V <sub>10</sub> -D0H60Ep      | 13.5 ± 0.3 | 181.5 ± 12   | 11.7 ± 0.2 | 320.1 ± 36.4 |
| V <sub>11</sub> -D0.5H60_Ep   | 15.5 ± 0.5 | 236.8 ± 19   | 12.4 ± 0.3 | 280.9 ± 28.9 |
| V <sub>12</sub> -D1H60_Ep     | 18.8 ± 0.8 | 355.5 ± 26   | 15.7 ± 0.6 | 473.8 ± 22.0 |

264

265

266

## 267 Discussion

268 The dimensionality reduction for the model fit is a recurring theme in several studies  
 269 aimed at genomic prediction of genetic values [6,12,20,21]. However, it is worth noting that  
 270 there is a difference between two approaches usually considered as dimensionality reduction  
 271 ones. The first approach uses methods such as main and independent components to obtain  
 272 latent variables that will be used to fit the models. With that strategy, the main goal is not to  
 273 exclude markers but to use the latent variables, which are linear combinations of all available  
 274 markers, to fit the model. In the second approach, the researcher has an interest in selecting the  
 275 markers most related to the traits of interest and uses them in fitting the models whether they  
 276 are regression ones or diversified architectures of computational intelligence [22,2,5] for their  
 277 benefits both in regression models and in diversified architectures of computational intelligence.  
 278 The present study considers the second approach.

279 In general, in terms of reliability, dimensionality reduction positively impacted all the  
 280 scenarios evaluated, which represented different genetic architectures (Table 1). Better  
 281 performance was not observed regarding the use of neural networks when compared with the  
 282 results obtained with RR-BLUP. These results suggest that the degree of simulated epistasis, in

283 which only dual interactions between subsequent markers are considered, was not a determining  
284 factor in differentiating the fit of regression models and neural networks. In terms of dominance,  
285 as already reported in the literature [22,23,24,25,26], that is not regarded as a problem in  
286 genomic prediction studies. Therefore, even if non-parametric models such as artificial neural  
287 networks do not need to impose strong assumptions upon the phenotype-genotype relationship  
288 presenting the potential to capture interactions between loci by the interactions between neurons  
289 of different layers [27,2], a substantial improvement in the prediction process depends on the  
290 level of epistasis present. In terms of reliability, similar results were observed in the studies  
291 carried out by [2,6], which were based on complete genome simulation with 2000 markers in a  
292 random mating population of bulls and heifers in three scenarios: additive, dominant and  
293 epistatic. In the present study, two RBFNN models were used, and in the first one there were  
294 specific weights for each SNP; while in the second one, all SNPs had the same importance. In  
295 most cases, the model with specific weights was better than that with a common weight for  
296 each SNP.

297 Weigel et al. [28,29] compared the use of some equally spaced markers in the genome  
298 and imputed other markers based on a reference population with all the genotyped markers  
299 using a set of markers selected according to their effect on the character of interest. The above  
300 authors concluded that when the number of selected markers is small, the predictive capacity  
301 of the model with markers selected according to the effect is higher than the use of a smaller  
302 set of markers scattered throughout the genome.

303 On the other hand, considering the results within the two approaches evaluated (RBFNN  
304 and RR-BLUP), dimensionality reduction also caused a reduction in the RMSE values. These  
305 results were similar to those obtained by the authors in [10], who observed that it is possible to  
306 improve prediction, both in terms of  $R^2$  and RMSE, predicting genetic values by means of non-  
307 parametric models when the selection includes markers that are not related to the traits of  
308 interest. When the methods were compared, a gain was observed in terms of RMSE when the  
309 fitting was performed by means of Neural Networks.

310 In the case of RR-BLUP, the effects of dominance and epistasis contributed to the  
311 increase of the error by increasing the difference between the expected and the observed values.  
312 In this way, when the interest is to select only a few individuals, the best 20% for example may  
313 not be the same. Similar results were observed in the study developed by the authors in [6],  
314 who used simulation of quantitative characters under different modes of gene action (additive,  
315 dominant, and epistatic) and found that RBFNN had a better ability to predict the merit of  
316 individuals in future generations in the presence of non-additive effects than by using an

317 additive linear model, such as the Bayesian Lasso one. In the case of purely additive gene effects,  
318 RBFNN was slightly worse than Lasso. Still in the above study, the authors reported the use of  
319 the dimensionality reduction method – of the main component type – before using RBFNN and  
320 also showed that with the selection of markers the performance of the radial base network was  
321 better.

322 In non-parametric models, no assumption is made regarding the form of the genotype–  
323 phenotype relationship. Rather, this relationship is described by a smoothing function and  
324 driven primarily by the data . Because of that, RBFNN should be flexible with respect to type  
325 of input data and mode of gene action, such as epistasis [8,30,31,7]. This is due to the fact that  
326 artificial neural networks (ANNs) can capture non-linear relationships between predictors and  
327 responses and learn about functional forms in an adaptive manner, since they act as universal  
328 approximators of complex functions [8]. ANNs are interesting candidates for the analysis of  
329 characters affected by genetic action with epistatic effects.

330 Due to the importance of epistasis in studies of quantitative traits in plants  
331 [32,33,34,35,36,37], explicit (in the model) or implicit (in hidden layers) inclusion of epistatic  
332 interactions may increase the accuracy of prediction [38]. Furthermore, the frequency variation  
333 of the epistatic allele between populations may cause the gene-of-interest effect to be significant  
334 in one population but not in another, and the effect may even be inverse on the character in  
335 different environments [5], which reinforces the importance of using computational intelligence  
336 methods that easily incorporate interactions between linear effects through their hidden layers.

## 337 **Conclusion**

338 The use of a variable selection procedure is an effective strategy to improve the  
339 prediction accuracy of computational intelligence techniques that successfully allow  
340 incorporating interactive effects, which in the present study represent biological epistatic  
341 interactions.

## 342 **References**

343 1.Risch NJ. Searching for genetic determinants in the new millennium. Nature. 2000;405  
344 (6788):847-856.  
346

- 347 2. Long N, Gianola D, Rosa GJ, Weigel KA, Kranis A, Gonzalez-Recio O. Radial basis  
348 function regression methods for predicting quantitative traits using SNP markers. *Genet Res.*  
349 2010; 92(3):209-225.
- 350 3. Mackay, TF, Stone, EA and Ayroles, JF. The genetics of quantitative traits: challenges and  
351 prospects. *Nat Rev Genet.* 2009;10(8), 565-577.
- 352 4. Meuwissen THE, Hayes BJ, Goddard ME. Prediction of total genetic value using genome-  
353 wide dense marker maps. *Genetics.* 2001;157(4):1819-1829. Akidemir D, Jannink JL, Isidro-  
354 Sánchez J. Locally epistatic models for genome-wide prediction and association by importance  
355 sampling. *Genet Sel Evol.* 2017; 49(1):74/s12711-017-0348-8
- 356 6. Long N, Gianola D, Rosa GJ, Weigel KA. Marker-assisted prediction of non-additive  
357 genetic values. *Genetica.* 2011;139(7):843-854.
- 358 7. Howard R, Carriquiry AL, Beavis WD. Parametric and nonparametric statistical methods  
359 for genomic selection of traits with additive and epistatic genetic architectures. *G3.* 2014; 4  
360 (6):1027-1046.
- 361 8. Gianola D, Okut H, Weigel KA, Rosa GJ. Predicting complex quantitative traits with  
362 Bayesian neural networks: a case study with Jersey cows and wheat. *BMC Genet.*  
363 2011.12(1):87. ([doi:10.1186/1471-2156-12-87](https://doi.org/10.1186/1471-2156-12-87))
- 364 9. Asvadi A, Karami M, Baleghi, Y. Efficient object tracking using optimized K-means  
365 segmentation and radial basis function neural networks.  
366 *Int J Res Eng Technol.* 2011;4(1):29-39.
- 367 10. González-Camacho JM, de Los Campos G, Pérez P, Gianola D, Cairns JE, Mahuku G,  
368 Babu R, Crossa J. Genome-enabled prediction of genetic values using radial basis function  
369 neural networks. *Theor Appl Genet.* 2012;125(4):759-771.



- 370 11. Crossa J, Pérez-Rodríguez P, Cuevas J, Montesinos-López O, Jarquín D, de los Campos  
371 G, Burgueño J, Camacho-González JM, Pérez-Elizalde S, Beyene Y, Dreisigacker S.  
372 Genomic selection in plant breeding: methods, models, and perspectives. *Trends Plant Sci.*  
373 2017;22(11):961-975.
- 374 12. Long N, Gianola D, Rosa GJ, Weigel KA. Dimension reduction and variable selection for  
375 genomic selection: application to predicting milk yield in Holsteins. *J Anim Breed Genet* .  
376 2011;128(4):247-257.
- 377 13. Cruz CD, Nascimento M. *Inteligência Computacional aplicada ao melhoramento*  
378 *genético*. 1st ed. Vicoso: Editora UFV; 2018.14. Chen S, Cowan CF and Grant PM. Orthogonal  
379 least squares learning algorithm for radial basis function networks. *IEEE Trans Neural Netw*  
380 *Learn Syst.* 1991; 2(2):302-309.
- 381
- 382 15. Matlab (2010). *Matlab Version 7.10.0*. Natick, Massachusetts: The Math Works Inc.
- 383 16. Asvadi A, Karami M, Baleghi M. Efficient Object Tracking Using Optimized K-means  
384 Segmentation and Radial Basis Function Neural Networks. *Int J Eng Res Appl.* 2011;4:(1),  
385 29-39.
- 386 17. Montgomery DC, Peck EA, Vining GG. *Introduction to linear regression analysis*. New  
387 York: John Wiley and Sons. New York: J. Wiley, 1982. 504p.
- 388 18. Cruz CD. Genes Software-extended and integrated with the R, Matlab and Selegen Acta  
389 *Sci Agron.* 2016;38(4):547-52.
- 390 19. R CORE TEAM. *R: A language and environment for statistical computing*. Vienna: R  
391 Foundation for Statistical Computing, 2017. Available at: <<https://www.R-project.org/>>.

- 392 20. Azevedo CF, de Resende MD, Fonseca F, Lopes PS, Guimarães SE. Regressão via  
393 componentes independentes aplicada à seleção genômica para características de carcaça em  
394 suínos. PAB. 2013;48(6):619-626.
- 395 21. Azevedo CF, Silva FF, de Resende MD, Lopes MS, Duijvesteijn N, Guimarães SE, Lopes  
396 PS, Kelly MJ, Viana JM, Knol EF. Supervised independent component analysis as an  
397 alternative method for genomic selection in pigs. J Anim Breed Genet. 2014;131(6):452-61.
- 398 22. Long N, Gianola D, Rosa GJ, Weigel KA, Avendano S. Machine learning classification  
399 procedure for selecting SNPs in genomic selection: application to early mortality in broilers.  
400 . J Anim Breed Genet. 2007;124(6):377-89.
- 401 23. Denis M, Bouvet JM. Genomic selection in tree breeding: testing accuracy of prediction  
402 models including dominance effect. BMC Proc.2011; 5( 7): O13.
- 403 24. Almeida Filho JE, Guimarães JF, e Silva FF, de Resende MD, Muñoz P, Kirst M, Resende  
404 Jr MF. The contribution of dominance to phenotype prediction in a pinebreeding and simulated  
405 population. Heredity. 2016;117(1):33-41.
- 406 25. Santos VS, Martins Filho S, de RESENDE MD, Azevedo CF, Lopes PS, Guimarães SE,  
407 Silva FF. Genomic prediction for additive and dominance effects of censored traits in pigs.  
408 Genet Mol. Res. 2016, 15(4)/gmr15048764.
- 409 26. Xu Y, Wang X, Ding X, Zheng X, Yang Z, Xu C, Hu Z. Genomic selection of agronomic  
410 traits in hybrid rice using an NCII population. Rice. 2018;11(1):32/ s12284-018-0223-427.
- 411 27. Gianola D, Fernando RL, Stella A. Genomic-assisted prediction of genetic values with  
412 semi-parametric procedures. Genetics. 2006; 173:1761–1776.

413 28. Weigel KA, de Los Campos G, Vazquez AI, Rosa GJ, Gianola D, Van Tassell CP.  
414 Accuracy of direct genomic values derived from imputed single nucleotide polymorphism  
415 genotypes in Jersey cattle. *J Dairy Sci.* 2010;93(11):5423-5435.

416 29. Weigel KA, Van Tassell CP, O'Connell JR, VanRaden PM, Wiggans GR. Prediction of  
417 unobserved single nucleotide polymorphism genotypes of Jersey cattle using reference panels  
418 and population-based imputation algorithms. *J Dairy Sci.* 2010;93(5):2229-2238.

419

420 30. Pérez-Rodríguez P, Gianola D, González-Camacho JM, Crossa J, Manès Y, Dreisigacker  
421 S. Comparison between linear and non-parametric regression models for genome-enabled  
422 prediction in wheat. *G3.* 2012;2(12):1595-1605.

423

424 31. Felipe, V.P., Okut, H., Gianola, D., Silva, M.A. and Rosa, G.J., 2014. Effect of genotype  
425 imputation on genome-enabled prediction of complex traits: an empirical study with mice data.  
426 *BMC genet.*, 15(1):149.

427

428 32. Holland JB. Theoretical and biological foundations of plant breeding. In: Lamkey KR, Lee  
429 M, editors. *Plant breeding: the Arnel R Hallauer International Symposium.* Blackwell  
430 Publishing; 2006. pp. 127-140

431

432 33. Dudley JW. Epistatic interactions in crosses of Illinois high oil 9 Illinois low oil and of  
433 Illinois high protein 9 Illinois low protein. *Crop Sci.* 2008; 48:59–68.

434

435 34. Zheng S, Li Z, Wang H A genetic fuzzy radial basis function neural network for structural  
436 health monitoring of composite laminated beams. *Expert Syst Appl.* 2011; 38:11837–11842.

437

438 35. Dudley JW, Johnson GR .Epistatic models improve between years prediction and prediction  
439 of testcross performance in corn. *Crop Sci.* 2010;50:763–769.

440

441 36. Denis M, Bouvet JM. Genomic selection in tree breeding: testing accuracy of prediction  
442 models including dominance effect. *BMC Proc.* 2011; 5(Suppl7): O13.

443

444 37. Viana JM, Piepho HP. Quantitative genetics theory for genomic selection and efficiency of  
445 genotypic value prediction in open-pollinated populations. *Sci Agric.* 2017;74(1):41-50.

446

447 38. Lee SH, van der Werf JH, Hayes BJ, Goddard ME, Visscher PM. Predicting unobserved  
448 phenotypes for complex traits from whole-genome SNP data. *PLoS genet.*  
449 2008;4(10):e1000231.

450

451

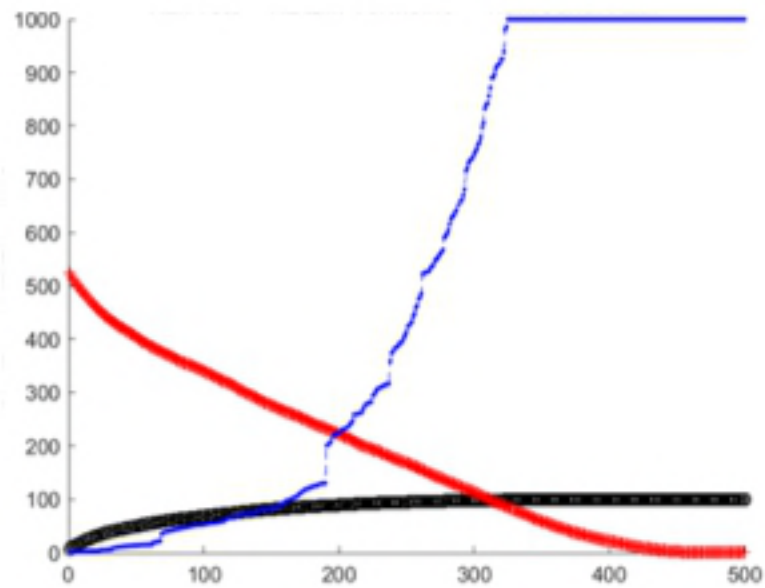

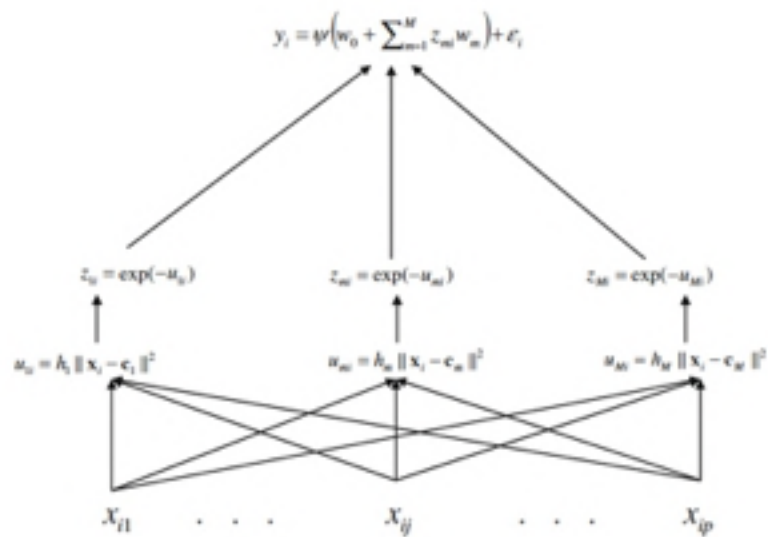

Source: https://www.biorxiv.org/content/10.1101/490474v1.full.pdf
